# Supplementary material
Source: publisher figshare collection journal article supplement (https://asha.figshare.com/articles/dataset/_/20044427)
Supplement: Supplementary file 1 [file 1]

### **Supplemental Material S3. Resources for patients, families, and clinicians in working with CALD families and interpreters.**

Useful resources shared by managers and a reviewer of the manuscript.

#### **Resources for patients and families on navigating the healthcare system**

- Translated information on hearing in the early stages (Queensland Government, Queensland Health): <https://www.childrens.health.qld.gov.au/chq/our-services/community-health-services/healthy-hearing-program/resources/>.
- Translated health information on seeing clinicians (Queensland Government, Queensland Health): <https://www.health.qld.gov.au/multicultural/public/language>.
- Translated information on SLP services (NSW Government, Multicultural Health Communication Service): [https://www.mhcs.health.nsw.gov.au/publications/resource-search?collectionfilter=1&fc\\_check=4a7035d4bc2e8eeacac8db127efcf4bf&fc\\_ends=40&SearchableText=speech+pathology](https://www.mhcs.health.nsw.gov.au/publications/resource-search?collectionfilter=1&fc_check=4a7035d4bc2e8eeacac8db127efcf4bf&fc_ends=40&SearchableText=speech+pathology).
- Easy English and translated information on SLP services (Speech Pathology Australia): [https://www.speechpathologyaustralia.org.au/SPAweb/General\\_Information/Fact\\_Sheets/SPAweb/General\\_Information/Fact\\_Sheets/Fact\\_Sheets.aspx?hkey=e0ad33fb-f640-45b1-8a06-11ed2b73f293#ind](https://www.speechpathologyaustralia.org.au/SPAweb/General_Information/Fact_Sheets/SPAweb/General_Information/Fact_Sheets/Fact_Sheets.aspx?hkey=e0ad33fb-f640-45b1-8a06-11ed2b73f293#ind).

#### **Resources for clinicians and services**

- An e-learning package on working with interpreters and translators, and interpreters and translators in working with SLPs (Queensland Government – Queensland Health): <https://www.childrens.health.qld.gov.au/e-learning-package-working-with-interpreters-and-translators/>.
- An e-learning package for SLPs working with interpreters and translators (Speech Pathology Australia): [https://speechpathologyaustralia.org.au/SPAweb/Document\\_Management/Projects/elearning\\_for\\_speech\\_pathologists.aspx](https://speechpathologyaustralia.org.au/SPAweb/Document_Management/Projects/elearning_for_speech_pathologists.aspx).
- How to work with interpreters onsite and on the phone (Queensland Government – Queensland Health): [https://www.health.qld.gov.au/\\_data/assets/pdf\\_file/0020/157322/how\\_to\\_work\\_int.pdf](https://www.health.qld.gov.au/_data/assets/pdf_file/0020/157322/how_to_work_int.pdf).
- Resources on multilingual children's communication skills and monitoring children's home language (Charles Sturt University): <https://www.csu.edu.au/research/multilingual-speech>.
- A tutorial paper by McLeod et al. (2017) on a speech assessment for children who do not use the same language as the SLP: [https://pubs.asha.org/doi/10.1044/2017\\_AJSLP-15-0161](https://pubs.asha.org/doi/10.1044/2017_AJSLP-15-0161).
- Multicultural Clinical Support Resource Folder with information on healthcare service provision for CALD patients and families, containing information on communication, working with interpreters, impact of diverse cultures and languages on healthcare,

policies, and more (Queensland Government – Queensland Health):

[https://www.health.qld.gov.au/multicultural/support\\_tools/mcsr](https://www.health.qld.gov.au/multicultural/support_tools/mcsr).

- Vietnamese speech therapy resources for SLPs (Trinh Foundation Australia): <https://trinhfoundation.org/our-resources/for-therapists/>.
- Assessments available in other languages or can be administered in other languages:
  - Parent Evaluation of Aural/Oral Performance of Children (PEACH) (National Acoustic Laboratories, LOCHI) <https://www.outcomes.nal.gov.au/peach>.
  - Hearing in Noise Test (HINT). Nilsson, M., Soli, S. D., & Sullivan, J. A. (1994). Development of the Hearing in Noise Test for the measurement of speech reception thresholds in quiet and in noise. *The Journal of the Acoustical Society of America*, 95(2), 1085-1099.
  - LING Sounds. Ling, D. (1976). *Speech and the hearing impaired child: Theory and practice*. Washington, DC: The Alexander Graham Bell Association for the Deaf. Inc. *Quoted in Erber, NP Auditory training*.
  - MacArthur Bates Communicative Development Inventories (MB-CDIs) (MacArthur Bates CDI) <https://mb-cdi.stanford.edu/>.
- Wordbank: an open database of children's vocabulary development (Stanford) <http://wordbank.stanford.edu/>.
- Queensland language services policy (Queensland Government – Department of Children, Youth Justice and Multicultural Affairs): <https://www.cyjma.qld.gov.au/multicultural-affairs/policy-governance/language-services-policy>.
- Information on diversity figures in Queensland (Queensland Government – Department of Children, Youth Justice and Multicultural Affairs): <https://www.cyjma.qld.gov.au/multicultural-affairs/multicultural-communities/search-diversity-queensland>.

### Resources for families and clinicians

- Multicultural health information for the public and health workers, translated health information, interpreting services, policies, plans, and strategies, and information on the multicultural health network (Queensland Government, Queensland Health): <https://www.health.qld.gov.au/multicultural>.
- Ear health resources for families and clinicians, including resources on working with families new to the country or Indigenous populations (Queensland Government – Queensland Health): <https://www.childrens.health.qld.gov.au/chq/our-services/community-health-services/deadly-ears/resources/>.
- Guidelines for patients, families, clinicians, and interpreters on interpreting and other language-accessibility resources (Queensland Government – Queensland Health): [https://www.health.qld.gov.au/multicultural/interpreters/qhis\\_guide\\_res](https://www.health.qld.gov.au/multicultural/interpreters/qhis_guide_res).

### Interpreting services

- Interpreter and translator services (Queensland Government, Queensland Health): <https://www.forgov.qld.gov.au/service-delivery-and-community-support/design-and-deliver-public-services/interpreter-and-translator-services>.

- Translating and interpreting service (TIS; Australian Government, Department of Home Affairs): <https://www.tisnational.gov.au/>.
- National Accreditation Authority for Translators and Interpreters (NAATI): a certified translation service: <https://www.naati.com.au/>.
- Auslan interpreting services (Deaf Services, Auslan Connections): <https://www.deafservices.org.au/services/Interpreting>.
