# Supplementary material
Source: publisher figshare collection journal article supplement (https://asha.figshare.com/articles/dataset/_/20044427)
Supplement: Supplementary file 3 [file 1]

## Supplemental Material S1. Topic guide for interviews with clinicians.

| Topic                                                | Questions                                                                                                                                                                                                                                                                                                                                                                                                                                                      |
|------------------------------------------------------|----------------------------------------------------------------------------------------------------------------------------------------------------------------------------------------------------------------------------------------------------------------------------------------------------------------------------------------------------------------------------------------------------------------------------------------------------------------|
| To start off...                                      | <ul style="list-style-type: none"> <li>How do you typically organise appointments for the CALD families, considering the language(s) they use?</li> </ul>                                                                                                                                                                                                                                                                                                      |
| About the interaction you have with CALD families... | <ul style="list-style-type: none"> <li>How do you typically interact with CALD families?</li> <li>What language support, if any, are you able to offer to aid your communication with them? What is useful/less useful?</li> <li>Can you describe your relationship with the CALD families, how is this different to non-CALD families?</li> </ul>                                                                                                             |
| About the information & advice you provide...        | <ul style="list-style-type: none"> <li>What information and advice/information materials do you give to CALD families that may be different to what you give to non-CALD families?</li> </ul>                                                                                                                                                                                                                                                                  |
| About the assessments...                             | <ul style="list-style-type: none"> <li>What assessments do you provide to CALD children that may be different to non-CALD children?</li> </ul>                                                                                                                                                                                                                                                                                                                 |
| About the CALD families' involvement..               | <ul style="list-style-type: none"> <li>Can you describe in what ways the CALD caregivers' involvement in their children's care may be different to non-CALD families?</li> <li>What particular skills and talents do they use in their care (different to non-CALD families)? What new skills/strategies do you teach?</li> <li>What impact do you feel the services have on the CALD families' lives (that may be different to non-CALD families)?</li> </ul> |
| About your involvement...                            | <ul style="list-style-type: none"> <li>Can you describe your involvement in their care that may be different to non-CALD families?</li> <li>How supported do you feel in working with CALD families? If anything, what support would you like more?</li> <li>How satisfied are you with the service you are able to provide to CALD families? If anything specific, what goes well and what doesn't?</li> </ul>                                                |
| About the interpreter... (if there)                  | <ul style="list-style-type: none"> <li>What is the interaction like with an interpreter present?</li> <li>Can you describe how you work together with an interpreter? If anything specific, what goes well? What may not go well?</li> </ul>                                                                                                                                                                                                                   |
| In an ideal world...                                 | <ul style="list-style-type: none"> <li>How would you like to see your appointments go in the future, if anything, what do you feel could be improved?</li> </ul>                                                                                                                                                                                                                                                                                               |
| Recommendations you may have...                      | <ul style="list-style-type: none"> <li>What tips would you have for CALD families thinking about getting these healthcare services? What tips would you have for other professionals working with CALD families? What tips would you have for healthcare organisations, and their protocols and policies?</li> </ul>                                                                                                                                           |
| Close                                                | <ul style="list-style-type: none"> <li>What else would you like to add to our interview, if anything?</li> </ul>                                                                                                                                                                                                                                                                                                                                               |
